# Supplementary material
Source: Research Square preprint supplement (doi:10.21203/rs.3.rs-9267494/v1)
Supplement: Supplementary file 1 [file 73620fbdc006215742ddcfae.xlsx]

## Sheet: References papers analyzed
Formalising Explainability and Interpretability: A Conceptual Framework and Taxonomical Dimensions Artificial Intelligence Review Pieri, Stefano and Baryannis, George and Papadakis, Emmanuel School of Computing and Engineering, University of Huddersfield, UK Corresponding author email: g.bargiannis@hud.ac.uk Online Resource 1: The table below contains the complete corpus of the papers included in…
Authors	Title	Year
Barredo Arrieta et al. (2020)	Explainable Artificial Intelligence (XAI): Concepts, taxonomies, opportunities and challenges toward responsible AI	2020
Montavon et al. (2018)	Methods for Interpreting and Understanding Deep Neural Networks	2018
Lipton (2016)	The Mythos of Model Interpretability	2016
Lou et al. (2012)	Intelligible models for classification and regression	2012
Gall (2018)	Machine Learning Explainability vs Interpretability: Two concepts that could help restore trust in AI	2018
Ribeiro et al. (2016)	“Why Should I Trust You?” Explaining the Predictions of Any Classifier	2016
Kim et al. (2016)	Examples are not Enough, Learn to Criticize! Criticism for Interpretability	2016
Dib (2024)	Formal definition of Interpretability and Explainability in XAI	2024
Ding (2018)	Human Knowledge in Constructing AI Systems ⎯ Neural Logic Networks Approach towards an Explainable AI	2018
Marconato et al. (2022)	GlanceNets: Interpretable, Leak-proof Concept-based Models	2022
Adadi and Berrada (2018)	Peeking Inside the Black-Box: A Survey on Explainable Artificial Intelligence (XAI)	2018
Doshi-Velez et al. (2017)	Towards A Rigorous Science of Interpretable Machine Learning	2017
Miller (2019)	Explanation in Artificial Intelligence: Insights from the Social Sciences	2019
Gilpin (2021)	Explaining Explanations: An Overview of Interpretability of Machine Learning	2021
Pearl (2019)	The seven tools of causal inference, with reflections on machine learning	2019
Langer et al. (2021)	What do we want from XAI	2021
NIST - Phillips et al. (2020)	Four Principles of Explainable Artificial Intelligence	2020
Combi et al. (2022)	A manifesto on explainability for artificial intelligence in medicine	2022
Gacto (2010)	Integration of an Index to Preserve the Semantic Interpretability in the Multiobjective Evolutionary Rule Selection and Tuning of Linguistic Fuzzy Systems	2020
Rudin (2018)	Stop Explaining Black Box Machine Learning Models for High Stakes Decisions and Use Interpretable Models Instead	2018
Holzinger (2021)	The next frontier: AAi we can really trust	2021
Holzinger (2019)	Causability and explainability of artificial intelligence in medicine	2019
Holzinger et al. (2019)	Measuring the Quality of Explanations: The System Causability Scale (SCS). Comparing Human and Machine Explanations	2019
Holzinger et al. (2021)	Towards multi-modal causability with Graph Neural Networks enabling information fusion for explainable AI	2021
Liu et al. (2021)	Trustworthy AI: A Computational Perspective	2021
Zednik (2021)	Solving the Black Box Problem: A Normative Framework for Explainable Artificial Intelligence	2021
Cabitza et al. (2023)	Quod erat demonstrandum? - Towards a typology of the concept of explanation for the design of explainable AI	2023
Chakraborty et al. (2017)	Interpretability of Deep Learning Models: A Survey of Results	2017
Radiuk et al. (2024)	Explainable Artificial Intelligence: Transitioning DL Model Decisions to User-Understandable Features in Healthcare	2024
Antoniou and Bargiannis (2022)	Mental Health Diagnosis: A Case for Explainable Artificial Intelligence	2022
Ali et al. (2023)	Explainable Artificial Intelligence (XAI): What we know and what is left to attain Trustworthy Artificial Intelligence	2023
Nauta et al. (2023)	From Anecdotal Evidence to Quantitative Evaluation Methods: A Systematic Review on Evaluating Explainable AI	2023
Guidotti et al. (2018)	A Survey of Methods for Explaining Black Box Model	2018
Zhang (2021)	A Survey on Neural Network Interpretability	2021
Gacto et al. (2011)	Interpretability of linguistic fuzzy rule-based systems: An overview of interpretability measures	2011
Rosenfeld and Richardson (2019)	Explainability in human-agents systems	2019
Alonso et al. (2009)	Looking for a good fuzzy system interpretability index: An experimental approach	2009
Zablocki et al. (2022)	Explainability of Deep Vision-Based Autonomous Driving Systems: Review and Challenges	2022
Alonso et al. (2015)	Interpretability of Fuzzy Systems: Current Research Trends and Prospects	2015
Ding et al. (2022)	Explainability of artificial intelligence methods, applications and challenges: A comprehensive survey	2022
Mencar (2011)	Interpretability assessment of fuzzy knowledge bases: A cointension based approach	2011
Chazette et al. (2021)	Exploring Explainability: A Definition, a Model, and a Knowledge Catalogue	2021
Hou & Zhou (2020)	Learning with Interpretable Structure from Gated RNN	2020
Lv et al. (2022)	On Glocal Explainability of Graph Neural Networks	2022
Sakai and Nagai (2022)	Explainable autonomous robots: a survey and Perspective	2022
Wallkotter et al. (2021)	Explainable Embodied Agents Through Social Cues: A Review	2021
Kieseberg et al. (2023)	Controllable AI	2023
Verhagen et al. (2021)	A two-dimensional Explanation Framework to Classify AI as Incomprehensible, Interpretable, or Understandable	2021
Mikut et al. (2005)	Interpretability issues in data-based learning of fuzzy systems	2005
Hakkoum (2021)	assessing and comparing interpretability techniques for artificial neural networks breast cancer classification	2021
Mariotti (2023)	Exploring the balance between interpretability and performance with carefully designed constrainable Neural Additive Models	2023
Retzlaff (2024)	Human-in-the-Loop Reinforcement Learning: A Survey and Position on Requirements, Challenges, and Opportunities	2024
Bellucci et al. (2021)	Towards a terminology for a fully contextualized XAI	2021
Nizam and Zafar (2023)	Explainable Artificial Intelligence (XAI): Conception, Visualization and Assessment Approaches Towards Amenable XAI	2023
Kim et al. (2019)	The Structure of Deep Neural Network for Interpretable Transfer Learning	2019
Cortiñas-Lorenzo and Lacey (2024)	Toward Explainable Affective Computing: A Review	2024
Beretta et al. (2023)	Defining human-AI teaming the human-centered way: a scoping review and network analysis	2023
Palacio et al. (2021)	XAI Handbook: Towards a Unified Framework for Explainable AI	2021
Hall (2021)	A United States Fair Lending Perspective on Machine Learning	2021
Nyrup and Robinson (2022)	Explanatory pragmatism: a context‑sensitive framework for explainable medical AI	2022
Graziani et al. (2023)	A global taxonomy of interpretable AI: unifying the terminology for the technical and social sciences	2023
Ishibuchi et al. (2009)	Complexity, Interpretability and Explanation Capability of Fuzzy Rule-Based Classifiers	2009
Frasca et al. (2024)	Explainable and interpretable artificial intelligence in medicine: a systematic bibliometric review	2024
Xu Kang et al. (2023)	Interpretability for reliable, efficient, and self-cognitive DNNs: From theories to applications	2023
Gaudio et al. (2022)	DeepFixCX: Explainable privacy-preserving image compression for medical image analysis	2022
Zhiwen Chen et al. (2021)	GCN-CAM: A new graph convolutional network-based fault diagnosis method with its interpretability analysis	2021
Xu and Yang (2025)	Interpretability research of deep learning: A literature survey	2025
Namatevs et al. (2022)	Interpretability versus Explainability: Classification for Understanding Deep Learning Systems and Models	2022
Sipple & Youssef (2022)	A general-purpose method for applying Explainable AI for Anomaly Detection	2022
Hepworth et al. (2021)	Human-Swarm-Teaming Transparency and Trust Architecture	2021
Luo et al. (2024)	Local Interpretations for Explainable Natural Language Processing: A Survey	2024
Roque & Damorodan (2022)	Explainable AI for Security of Human-Interactive Robots	2022
Merry et al. (2021)	A mental models approach for defining explainable artificial intelligence	2021
Nicodeme and Denis (2020)	Build confidence and acceptance of AI-based decision support systems - Explainable and liable AI	2020
Panagoulias et al. (2024)	A novel framework for artificial intelligence explainability via the Technology Acceptance Model and Rapid Estimate of Adult Literacy in Medicine using machine learning	2024
Wen et al. (2022)	ExpScore: Learning Metrics for Recommendation Explanation	2022
Batra and Mahajan (2021)	Deep Learning Models: An Understandable Interpretable Approach	2021
de Campos Aranovich and Matulionyte (2023)	Ensuring AI explainability in healthcare: problems and possible policy solutions	2023
Roundtree (2023)	AI Explainability, Interpretability, Fairness, and Privacy: An Integrative Review of Reviews	2023
Islam et al. (2020)	Towards Quantification of Explainability in Explainable Artificial Intelligence Methods	2020
Rosenfeld & Richardson (2020)	Why, Who, What, When and How about Explainability in Human-Agent Systems	2020
Aguirre-Zapata et al. (2023)	Understanding Interpretability in Modeling Biotechnological Processes: A Critical Review	2023
Gupta (2023)	Explainable Artificial Intelligence with Conceptual Model Guiding in the Perspective of Stakeholders in Interdisciplinary Research	2023
Layfield and Neri (2023)	Explainability and interpretability in decision trees and agend based modelling When approximating financial time series. A matter of balance with performance	2023
Quinn et al. (2020)	DeepCoDA: personalized interpretability for compositional health	2020
Ortigossa et al. (2024)	EXplainable Artificial Intelligence (XAI)—From Theory to Methods and Applications	2024
Gou et al (2023)	A Fundamental Model with Stable Interpretability for Traffic Forecasting	2023
Ghidini (2024)	Statistics and explainability: a fruitful alliance	2024
Holmberg et al. (2020)	Evaluating Interpretability in Machine Teaching	2020
De Fazio et al. (2022)	Explainability Comparison between Random Forests and Neural Networks—Case Study of Amino Acid Volume Prediction	2022
Picard et al. (2023)	Human-Computer Interaction and Explainability: Intersection and Terminology	2023
Neri (2023)	Explainability and Interpretability in Agent based Modelling to Approximate Market Indexes	2023
Wagenpfeil et al. (2021)	Towards Automated Semantic Explainability of Multimedia Feature Graphs	2021
Xu (2024)	Toward Building Computational Well-Being Ecosystems	2024
Dong et al. (2024)	Interpretability as Approximation: Understanding Black-Box Models by Decision Boundary	2024
Khan et al. (2024)	Heterogeneous transfer learning: recent developments, applications, and challenges	2024
Černevičienė & Kabašinskas (2024)	Explainable artifcial intelligence (XAI) in fnance: a systematic literature review	2024
Lu and Ebrahimi (2023)	Explanation of Face Recognition via Saliency Maps	2023
Gauriat et al. (2023)	Multi-class Neural Additive Models : An Interpretable Supervised Learning Method for Gearbox Degradation Detection	2023
Pugoy and Kao (2024)	NEAR: Non-Supervised Explainability Architecture for Accurate Review-Based Collaborative Filtering	2024
Chaudury et al. (2024)	Explainable AI Using the Wasserstein Distance	2024
Carvalho et al. (2019)	Machine Learning Interpretability: A Survey on Methods and Metrics	2019
Murdoch et al. (2019)	Interpretable machine learning: definitions, methods, and applications	2019
Kohl et al. (2019)	Explainability as a Non-Functional Requirement	2019
INDEPENDENT HIGH-LEVEL EXPERT GROUP ON ARTIFICIAL INTELLIGENCE SET UP BY THE EUROPEAN COMMISSION (2020)	THE ASSESSMENT LIST FOR TRUSTWORTHY ARTIFICIAL INTELLIGENCE (ALTAI) for self assessment	2020
Doran et al. (2018)	What Does Explainable AI Really Mean? A New Conceptualization of Perspectives	2018
Ciatto et al. (2020)	Agent-Based Explanations in AI: Towards an Abstract Framework	2020
Calegari et al. (2020)	On the integration of symbolic and sub-symbolic techniques for XAI: A survey	2020
Dwivedi et al. (2023)	Explainable AI (XAI): Core Ideas, Techniques, and Solutions	2023
Broniatowski (2021)	Psychological Foundations of Explainability and Interpretability in Artificial Intelligence	2021
Li et al. (2022)	Interpretable Deep Learning: Interpretation, Interpretability, Trustworthiness, and Beyond	2022
Setchi et al. (2020)	Explainable Robotics in Human-Robot Interactions	2020
Gleaves et al. (2020)	THE ROLE OF INDIVIDUAL USER DIFFERENCES IN INTERPRETABLE AND EXPLAINABLE MACHINE LEARNING SYSTEMS	2020
Das and Rad (2020)	Opportunities and challenges in explainable artificial intelligence (XAI): a survey	2020
Burkart and Huber (2021)	A survey on the explainability of supervised machine learning	2021
Fox et al. (2017)	Explainable planning	2017
Dosilovic et al. (2018)	Explainable Artificial Intelligence: A Survey	2018
Murdoch et al. (2022)	Definitions, methods, and applications in interpretable machine learning	2022
Amann et al. (2022)	To explain or not to explain?—Artificial intelligence explainability in clinical decision support systems	2022
Tjoa & Guan (2020)	A Survey on Explainable Artificial Intelligence (XAI): Toward Medical XAI	2020
Ehsan and Riedl (2020)	Human-centered Explainable AI: Towards a Reflective Sociotechnical Approach	2020
Silva et al. (2023)	Explainable Artificial Intelligence: Evaluating the Objective and Subjective Impacts of xAI on Human-Agent Interaction	2023
Biran and Cotton (2017)	Explanation and Justification in Machine Learning: A Survey	2017
Fan et al. (2021)	On Interpretability of Artificial Neural Networks: A Survey	2021
Guizzardi and Guardino (2023)	Semantics, Ontology and Explanation	2023
Mucha et al. (2021)	Interfaces for Explanations in Human-AI Interaction: Proposing a Design Evaluation Approach	2021
Hamon (2021)	Impossible Explanations? Beyond explainable AI in the GDPR from a COVID-19 use case scenario	2021
Brunotte et al. (2023)	Privacy explanations – A means to end-user trust	2023
Deters et al. (2023)	Explanations on Demand - a Technique for Eliciting the Actual Need for Explanations	2023
Lakkaraju et al. (2016)	Interpretable Decision Sets: A Joint Framework for Description and Prediction	2016
Peake and Wang (2016)	Explanation Mining: Post Hoc Interpretability of Latent Factor Models for Recommendation Systems	2018
Wang et al. (2018)	TEM: Tree-enhanced Embedding Model for Explainable Recommendation	2018
Gregor and Bensabat (1999)	Explanations from Intelligent Systems: Theoretical Foundations and Implications for Practice	1999
Chazette and Schneider (2020)	Explainability as a non‑functional requirement: challenges and recommendations	2020
Schwammberger (2021)	A Quest of Self-Explainability: When Causal Diagrams meet Autonomous Urban Traffic Manoeuvres	2021
Ziesche et al. (2021)	Anomaly Detection and Classification to enable Self-Explainability of Autonomous Systems	2021
Capuano et al. (2022)	Explainable Artificial Intelligence in CyberSecurity: A Survey	2022
Ciatto et al. (2020)	An Abstract Framework for Agent-Based Explanations in AI	2020
Bhatt et al. (2020)	Explainable Machine Learning in Deployment	2020
Zhang and Chen (2020)	Explainable Recommendation: A Survey and New Perspectives	2020
Glanois et al. (2022)	A Survey on Interpretable Reinforcement Learning	2022
Trivedi et al. (2024)	Explainable AI for Industry 5.0: Vision, Architecture, and Potential Directions	2024
Shorabi et al. (2011)	Preferred Explanations: Theory and Generation via Planning	2011
Seegebarth et al. (2012)	Making Hybrid Plans More Clear to Human Users — A Formal Approach for Generating Sound Explanations	2012
Langley et al. (2017)	Explainable Agency for Intelligent Autonomous Systems	2017
Angelov et al. (2021)	Explainable artificial intelligence: an analytical review	2021
Belle and Papantonis (2021)	Principles and Practice of Explainable Machine Learning	2021
McDermid et al. (2021)	Artificial intelligence explainability: the technical and ethical dimensions	2021
Hase and Bansal (2020)	Evaluating Explainable AI: Which Algorithmic Explanations Help Users Predict Model Behavior?	2020
Tomsett et al. (2018)	Interpretable to Whom? A Role-based Model for Analyzing Interpretable Machine Learning Systems	2018
Dhurandar et al. (2017)	A Formal Framework to Characterize Interpretability of Procedures	2017
Ras et al. (2018)	Explanation Methods in Deep Learning: Users, Values, Concerns and Challenges	2018
Ibrahim et al. (2019)	Global Explanations of Neural Network	2019
Rudin et al. (2021)	Interpretable Machine Learning: Fundamental Principles and 10 Grand Challenges	2021
Poursabzi-Sangdeh (2021)	Manipulating and Measuring Model Interpretability	2021
Pedreschi et al. (2019)	Meaningful Explanations of Black Box AI Decision Systems	2019
Xie & Yu (2018)	Next Generation Trustworthy Fraud Detection	2018
Dhurandhar et al. (2018)	TIP: Typifying the Interpretability of Procedures	2018
Bohlender & Kohl (2021)	Towards a Characterization of Explainable Systems	2021
Chakraborti et al. (2019)	Explicability? Legibility? Predictability? Transparency? Privacy? Security? The Emerging Landscape of Interpretable Agent Behavior	2019
Coteaux et al. (2019)	Towards Interpretability of Segmentation Networks by Analyzing DeepDreams	2019
Jaakkola et al. (2022)	Explainability via Short Formulas: the Case of Propositional Logic with Implementation	2022
Lenhof et al. (2024)	Trust me if you can: a survey on reliability and interpretability of machine learning approaches for drug sensitivity prediction in cancer	2024
Holzinger et al. (2017)	What do we need to build explainable AI systems for the medical domain?	2017
Margot & Luta (2021)	A New Method to Compare the Interpretability of Rule-Based Algorithms	2021
Weller (2017)	Challenges for Transparency	2017
Doshi Velez et al. (2017)	Accountability of AI Under the Law:The Role of Explanation	2017
Johnson et al. (2022)	Integrating human knowledge into artificial intelligence for complex and ill-structured problems: Informed artificial intelligence	2022
Leslie (2019)	Understanding artificial intelligence ethics and safety: A guide for the responsible design and implementation of AI systems in the public sector	2019
Association for Computing Machinery (ACM) (2017)	ACM US Public Policy Council’s ‘Statement onAlgorithmic Transparency and Accountability’	2017
European Law Institute (2022)	Model Rules on ImpactAssessment of Algorithmic Decision-MakingSystems Used by Public Administration	2022
IBM (n.a.)	Explainable AI	(n.a.)
Microsoft (2018)	The Future Computed: ArtificialIntelligence and its Role in Society	2018
ISO/IEC FDIS 22989 (JTC 1/SC 42) (2022)	Information technology – Artificial intelligence – Artificial intelligence concepts and terminology	2022
European Union (2018)	Regulation (EU) 2016/679 (General Data Protection Regulation)	2018
European Union (2019)	European Commission,Directorate-General for Communications Networks,Content and Technology, Ethics guidelines fortrustworthy AI, Publications Office	2019
European Union. European Commission, Joint Research Centre, Sanchez, I., Junklewitz, H.,Hamon, R. (2020)	Robustness and explainability of Artificial Intelligence: from technical to policy solutions. Publications Office	2020
UNESCO. Ad Hoc Expert Group (AHEG). First Draft of the Recommendation on the Ethics ofArtificial Intelligence. (2020)	First Draft of the Recommendation on the Ethics of Artificial Intelligence.	2020
OECD. (2019)	The OECD Artificial Intelligence (AI)Principles, OECD.AI	2019
United Arab Emirates (2019)	Smart Dubai, Dubai’s AI Principles	2019
Monetary Authority of Singapore (2018)	Principles toPromote Fairness, Ethics, Accountability and Transparency (FEAT) in the Use of AI and Data Analytics in Singapore’s Financial Sector	2018
Singapore Personal Data Protection Commission (PDPC) (2020)	A compilation of existing AI ethical principles (Annex A)	2020
Popular Republic of China (effective in 2022)	Internet Information Service Algorithmic Recommendation Management Provisions	2022
Council for Social Principles of Human-centric AI by Cabinet Office, Government of Japan (2019)	Social Principles of Human-Centric AI	2019
Ministry of Internal Affairs and Communications (MIC), the Government of Japan (2017)	AI R&D Principles	2017
Turek, M. (2018)	Explainable artificial intelligence (XAI).’’ Defense Advanced Research Projects Agency. Department of Defense of the United States.	2018
Government of Canada (2019)	Responsible use of AI	2019
Lewis (1986)	Causal explanation	1986
Josephson & Josephson (1996)	Abductive inference:Computation, philosophy, technology	1996
Lombrozo (2006)	The structure and function of explanations	2006
Lundberg & Lee (2017)	A unified approach to interpreting model predictions	2017
Dam et al. (2018)	Explainable software analytics	2018
Lakkaraju et al. (2019)	Faithful and customizable explanations of black box models	2019
Vilone & Longo (2020)	Explainable artificial intelligence:a systematic review.	2020
Schmid & Finzel (2020)	Mutual explanations for cooperative decision making in medicine	2020
Al-Shedivat et al. (2020)	Contextual explanation networks	2020
Arya V, Bellamy RKE, Chen P-Y, Dhurandhar A, Hind M, Hoffman SC, Houde S, Liao QV, Luss R, Mojsilović A et al (2019)	One explanation does not fit all: A toolkit and taxonomy of ai explainability techniques.	2019
Mittelstadt B, Russell C, Wachter S. (2019)	Explaining explanations in AI	2019
Chromik & Schuessler (2020)	A taxonomy for human subject evaluation of black-box explanations in xai	2020
Ciatto et al. (2020)	Towards XMAS: explainability through multi-agent systems	2020
Wang et al. (2018)	A Reinforcement Learning Framework for Explainable Recommendation	2018
The Royal Society (2019)	Explainable AI: the basics – POLICY BRIEFING	2019
Rai (2020)	Explainable AI: from black box to glass box	2020
Islam et al. (2022)	A Systematic Review of Explainable Artificial Intelligence in Terms of Different Application Domains and Tasks	2022
Danilevsky et al. (2021)	A Survey of the State of Explainable AI for Natural Language Processing	2021
Zhang & Chen (2020)	Explainable Recommendation: A Surveyand New Perspectives	2020
Haque et al. (2023)	Explainable Artificial Intelligence (XAI) from a user perspective: A synthesis of prior literature and problematizing avenues for future research	2023
Khosravi et al. (2022)	Explainable Artificial Intelligence in education	2022
Weber et al. (2024)	Applications of Explainable Artifcial Intelligence in Finance—a systematic review of Finance, Information Systems, and Computer Science literature	2024
Retzlaff et al. (2024)	Post-hoc vs ante-hoc explanations: xAI design guidelines for data scientists	2024
Kraišniković et al. (2025)	Fine-tuning language model embeddings to reveal domain knowledge: An explainable artificial intelligence perspective on medical decision making	2025
Hanif et al. (2021)	A Survey on Explainable Artificial Intelligence Techniques and Challenges	2021
Choo & Liu (2018)	Visual Analytics for Explainable Deep Learning	2018
Mohseni et al. (2021)	A Multidisciplinary Survey and Framework for Design and Evaluation of Explainable AI Systems	2021
Wang & Lin (2021)	Hybrid Predictive Models: When an Interpretable Model Collaborates with a Black-box Model	2021
Sahakyan et al. (2022)	Explainable Artificial Intelligence for Tabular Data: A Survey	2022
Sheh (2017)	“Why Did You Do That?” Explainable Intelligent Robots	2017
Beaudouin et al. (2020)	Flexible and Context-Specific AI explainability: A Multidisciplinary Approach	2020
Muller et al. (2022)	Towards a Taxonomy for Explainable AI in Computational Pathology	2022
Mencar & Fanelli (2008)	Interpretability constraints for fuzzy information granulation	2008
Van Lent (2004)	An Explainable Artificial Intelligence System for Small-unit Tactical Behavior	2004
Puri et al. (2017)	MAGIX: Model Agnostic Globally Interpretable Explanations	2017
Hamon et al. (2020)	Robustness and Explainability of Artificial Intelligence	2020
Lei, Barzilay and Jaakkola (2016 )	Rationalizing Neural Predictions	2016
