# Supplementary material
Source: Research Square preprint supplement (doi:10.21203/rs.3.rs-9267494/v1)
Supplement: Supplementary file 1 [file f182329077ae6b6928f1fe90.pdf]

AI System

- System design
- Model
  - Architecture
    - Structure
    - Data structures
    - Operating principles
    - Properties
  - Parameters and settings
  - Inference process
    - Inner working
    - Input output mapping
    - System state
    - Decision making
    - Output
- Data
  - Datasets
  - Data splits
  - Data distributions
  - Data procedures
    - Data preprocessing
    - Feature engineering
  - Input variables and Features
    - Inputs
    - Features
    - Relationships between domain variables
- Training
  - Learning algorithm
  - Learning objective
- Performance
  - Assessment objective
  - Metrics

Human user

- Internal state
  - Mental model
  - Mental representation
- Objectives
  - Epistemic objectives
  - Operational objectives
  - Ethical objectives
  - Governance and management objectives
  - Alignment objectives
- Individual factors
  - Preferences
  - Explanatory desires
  - Capabilities
  - Background and knowledge
  - Subjectivity
  - Other relevant factors

Interaction

- AI System - Human user
  - Communication specifics
    - Standard communicational dimensions
    - Encoding/decoding information
    - Content
      - Message
      - Representation
      - Approach
      - Properties
      - Type
    - Medium
    - Noise
    - Interactivity
  - XAI specifics
    - Scope
    - Intrinsic property
    - Timeliness
- Activity
  - Action performed by a specific entity
- Actions
  - Interaction management
  - Informative actions
  - Cognitive actions
- Other interactions
  - AI System self-interaction
    - Effects of action on the system itself
    - Autonomous actions
    - Internal structure awareness
  - AI System - Context
    - Effects of actions on environment
  - Human user - Context
    - Context comprehension
    - Environment comprehension

Context

- Context dependency
- Contextual factors
  - Situational definition
    - Domain dependency
    - Problem dependency
    - Task dependency
    - AI application dependency
  - Environment
- Entity identification and specification
  - AI System
    - Type of system dependency
    - Model sensitivity
  - Human user
    - Audience groups
    - Type of users
  - Interaction (AI system - Human user)
    - Audience adaptation to explanations
    - Accessibility
    - Presence of a conversational context
    - Specific query dependency
    - Purpose of interaction
- Operational conditions
  - Time pressure
  - Stakes at hand
  - Operational limitations
  - External knowledge required
  - Presence of constraints
