# Supplementary material
Source: Research Square preprint supplement (doi:10.21203/rs.3.rs-9267494/v1)
Supplement: Supplementary file 2 [file a4486914b1e935c5cfa04a4f.xlsx]

## Sheet: Formatted
Formalising Explainability and Interpretability: A Conceptual Framework and Taxonomical Dimensions Artificial Intelligence Review Pieri, Stefano and Baryannis, George and Papadakis, Emmanuel School of Computing and Engineering, University of Huddersfield, UK Corresponding author email: g.bargiannis@hud.ac.uk Online Resource 2: This is the complete descriptive table linking papers, definitions and…
					AI system
							Model
					System's design		Architecture																Parameters and settings				Inference process
Authors	Title	Year	Definition Unique Code	Definition also used by:		Technical characteristics of the system developed	Components / elements / parts of the model								Working/operating principles behind model			Data structures	Properties				Settings		Parameters		System's state			Inner working
							Disclosed system elements	Parts of the model structure that influenced the decision	Model components (e.g. e.g., weight of a feature in a linear model, a path in a decision tree, or a specific rule)	Technical active parts of the algorithmic model / called "machine model"	Internal structure	Structure	About the system's rule-base	Nodes	Working principles	Operating principles	Preferences (from preference models)			Size	Complexity		Impact of variations in model's settings on the output		Each of model's parameters		System's state	Transitions between states		Internal aspects														How the model works
																				Model has a small size	Model has low complexity	Complexity reduction	Variation of model's inputs	Variation of model's parameters				transitions between state changes caused by operations	Transitions / state transitions	internal aspects of the model that led to the decision	Inner working			internal operations	Internal working	The underlying model	underlying mechanism of the model	Reveal the working mechanism	Inner mechanism	Internal mechanism	internal mechanics	Internals of the model	Internal affairs	How the model forms the output	How the model makes decisions	How the model reaches its conclusions	How algorithms work	How the model works	How the model behaves
																																where decision boundaries are in classification tasks	uncover patterns within the inner mechanism
EXPLAINABILITY
INTERPRETABILITY
					1	2	3	4	5	6	7	8	9	10	11	12	13	14	15	16	17	18	19	20	21	22	23	24	25	26	27	28	29	30	31	32	33	34	35	36	37	38	39	40	41	42	43	44	45
Barredo Arrieta et al. (2020)	Explainable Artificial Intelligence (XAI): Concepts, taxonomies, opportunities and challenges toward responsible AI	2020	E-1	E-114; E-276
Montavon et al. (2018)	Methods for Interpreting and Understanding Deep Neural Networks	2018	E-2
Gall (2018)	Machine Learning Explainability vs Interpretability: Two concepts that could help restore trust in AI	2018	E-5	E-116																																					x
Ribeiro et al. (2016)	“Why Should I Trust You?” Explaining the Predictions of Any Classifier	2016	E-7
Dib (2024)	Formal definition of Interpretability and Explainability in XAI	2024	E-9
Ding (2018)	Human Knowledge in Constructing AI Systems ⎯ Neural Logic Networks Approach towards an Explainable AI	2018	E-11
Adadi and Berrada (2018)	Peeking Inside the Black-Box: A Survey on Explainable Artificial Intelligence (XAI)	2018	E-16
Miller (2019)	Explanation in Artificial Intelligence: Insights from the Social Sciences	2019	E-19	E-68
Gilpin (2021)	Explaining Explanations: An Overview of Interpretability of Machine Learning	2021	E-21
Pearl (2019)	The seven tools of causal inference, with reflections on machine learning	2019	E-22
Langer et al. (2021)	What do we want from XAI	2021	E-24
NIST - Phillips et al. (2020)	Four Principles of Explainable Artificial Intelligence	2020	E-25
Combi et al. (2022)	A manifesto on explainability for artificial intelligence in medicine	2022	E-26
Rudin (2018)	Stop Explaining Black Box Machine Learning Models for High Stakes Decisions and Use Interpretable Models Instead	2018	E-28
Holzinger et al. (2019)	Measuring the Quality of Explanations: The System Causability Scale (SCS). Comparing Human and Machine Explanations	2019	E-31	E-29; E-30; E-32; E-70; E-288						x
Liu et al. (2021)	Trustworthy AI: A Computational Perspective	2021	E-33
Zednik (2021)	Solving the Black Box Problem: A Normative Framework for Explainable Artificial Intelligence	2021	E-35
Cabitza et al. (2023)	Quod erat demonstrandum? - Towards a typology of the concept of explanation for the design of explainable AI	2023	E-37
Chakraborty et al. (2017)	Interpretability of Deep Learning Models: A Survey of Results	2017	E-38
Radiuk et al. (2024)	Explainable Artificial Intelligence: Transitioning DL Model Decisions to User-Understandable Features in Healthcare	2024	E-39
Antoniou and Bargiannis (2022)	Mental Health Diagnosis: A Case for Explainable Artificial Intelligence	2022	E-40
Ali et al. (2023)	Explainable Artificial Intelligence (XAI): What we know and what is left to attain Trustworthy Artificial Intelligence	2023	E-41																												x
Nauta et al. (2023)	From Anecdotal Evidence to Quantitative Evaluation Methods: A Systematic Review on Evaluating Explainable AI	2023	E-42																																x
Guidotti et al. (2018)	A Survey of Methods for Explaining Black Box Model	2018	E-43
Rosenfeld and Richardson (2019)	Explainability in human-agents systems	2019	E-46	E-102
Zablocki et al. (2022)	Explainability of Deep Vision-Based Autonomous Driving Systems: Review and Challenges	2022	E-51
Ding et al. (2022)	Explainability of artificial intelligence methods, applications and challenges: A comprehensive survey	2022	E-53																																								x
Chazette et al. (2021)	Exploring Explainability: A Definition, a Model, and a Knowledge Catalogue	2021	E-55	E-156														x								x																x
Hou & Zhou (2020)	Learning with Interpretable Structure from Gated RNN	2020	E-56
Lv et al. (2022)	On Glocal Explainability of Graph Neural Networks	2022	E-58
Wallkotter et al. (2021)	Explainable Embodied Agents Through Social Cues: A Review	2021	E-61																												x
Kieseberg et al. (2023)	Controllable AI	2023	E-64
Verhagen et al. (2021)	A two-dimensional Explanation Framework to Classify AI as Incomprehensible, Interpretable, or Understandable	2021	E-66				x
Mariotti (2023)	Exploring the balance between interpretability and performance with carefully designed constrainable Neural Additive Models	2023	E-69
Bellucci et al. (2021)	Towards a terminology for a fully contextualized XAI	2021	E-71
Nizam and Zafar (2023)	Explainable Artificial Intelligence (XAI): Conception, Visualization and Assessment Approaches Towards Amenable XAI	2023	E-72
Beretta et al. (2023)	Defining human-AI teaming the human-centered way: a scoping review and network analysis	2023	E-75
Palacio et al. (2021)	XAI Handbook: Towards a Unified Framework for Explainable AI	2021	E-76
Hall (2021)	A United States Fair Lending Perspective on Machine Learning	2021	E-77
Nyrup and Robinson (2022)	Explanatory pragmatism: a context‑sensitive framework for explainable medical AI	2022	E-78
Ishibuchi et al. (2009)	Complexity, Interpretability and Explanation Capability of Fuzzy Rule-Based Classifiers	2009	E-80
Frasca et al. (2024)	Explainable and interpretable artificial intelligence in medicine: a systematic bibliometric review	2024	E-81											x												x
Xu Kang et al. (2023)	Interpretability for reliable, efficient, and self-cognitive DNNs: From theories to applications	2023	E-82									x				x										x
Gaudio et al. (2022)	DeepFixCX: Explainable privacy-preserving image compression for medical image analysis	2022	E-83
Namatevs et al. (2022)	Interpretability versus Explainability: Classification for Understanding Deep Learning Systems and Models	2022	E-86
Sipple & Youssef (2022)	A general-purpose method for applying Explainable AI for Anomaly Detection	2022	E-87
Hepworth et al. (2021)	Human-Swarm-Teaming Transparency and Trust Architecture	2021	E-88
Luo et al. (2024)	Local Interpretations for Explainable Natural Language Processing: A Survey	2024	E-89
Roque & Damorodan (2022)	Explainable AI for Security of Human-Interactive Robots	2022	E-91																								x
Merry et al. (2021)	A mental models approach for defining explainable artificial intelligence	2021	E-92
Panagoulias et al. (2024)	A novel framework for artificial intelligence explainability via the Technology Acceptance Model and Rapid Estimate of Adult Literacy in Medicine using machine learning	2024	E-94
Wen et al. (2022)	ExpScore: Learning Metrics for Recommendation Explanation	2022	E-95
de Campos Aranovich and Matulionyte (2023)	Ensuring AI explainability in healthcare: problems and possible policy solutions	2023	E-99
Roundtree (2023)	AI Explainability, Interpretability, Fairness, and Privacy: An Integrative Review of Reviews	2023	E-100																												x
Islam et al. (2020)	Towards Quantification of Explainability in Explainable Artificial Intelligence Methods	2020	E-101
Layfield and Neri (2023)	Explainability and interpretability in decision trees and agend based modelling When approximating financial time series. A matter of balance with performance	2023	E-107																																x
Ortigossa et al. (2024)	EXplainable Artificial Intelligence (XAI)—From Theory to Methods and Applications	2024	E-110
Ghidini (2024)	Statistics and explainability: a fruitful alliance	2024	E-112
Holmberg et al. (2020)	Evaluating Interpretability in Machine Teaching	2020	E-113
Picard et al. (2023)	Human-Computer Interaction and Explainability: Intersection and Terminology	2023	E-115
Wagenpfeil et al. (2021)	Towards Automated Semantic Explainability of Multimedia Feature Graphs	2021	E-117
Dong et al. (2024)	Interpretability as Approximation: Understanding Black-Box Models by Decision Boundary	2024	E-119																						x
Khan et al. (2024)	Heterogeneous transfer learning: recent developments, applications, and challenges	2024	E-121
Černevičienė & Kabašinskas (2024)	Explainable artifcial intelligence (XAI) in fnance: a systematic literature review	2024	E-122																																					x
Lu and Ebrahimi (2023)	Explanation of Face Recognition via Saliency Maps	2023	E-123
Gauriat et al. (2023)	Multi-class Neural Additive Models : An Interpretable Supervised Learning Method for Gearbox Degradation Detection	2023	E-124
Pugoy and Kao (2024)	NEAR: Non-Supervised Explainability Architecture for Accurate Review-Based Collaborative Filtering	2024	E-125
Chaudury et al. (2024)	Explainable AI Using the Wasserstein Distance	2024	E-126
Kohl et al. (2019)	Explainability as a Non-Functional Requirement	2019	I-129	E-205
Ciatto et al. (2020)	Agent-Based Explanations in AI: Towards an Abstract Framework	2020	E-132	E-168
Calegari et al. (2020)	On the integration of symbolic and sub-symbolic techniques for XAI: A survey	2020	E-133
Dwivedi et al. (2023)	Explainable AI (XAI): Core Ideas, Techniques, and Solutions	2023	E-134
Dwivedi et al. (2023)	Explainable AI (XAI): Core Ideas, Techniques, and Solutions	2023	E-134.2
Broniatowski (2021)	Psychological Foundations of Explainability and Interpretability in Artificial Intelligence	2021	E-135
Wang et al. (2018)	A Reinforcement Learning Framework for Explainable Recommendation	2018	E-136																																			x
Setchi et al. (2020)	Explainable Robotics in Human-Robot Interactions	2020	E-138
Gleaves et al. (2020)	THE ROLE OF INDIVIDUAL USER DIFFERENCES IN INTERPRETABLE AND EXPLAINABLE MACHINE LEARNING SYSTEMS	2020	E-139
Das and Rad (2020)	Opportunities and challenges in explainable artificial intelligence (XAI): a survey	2020	E-140
Burkart and Huber (2021)	A survey on the explainability of supervised machine learning	2021	E-141
Fox et al. (2017)	Explainable planning	2017	E-142
Amann et al. (2022)	To explain or not to explain?—Artificial intelligence explainability in clinical decision support systems	2022	E-145
Ehsan and Riedl (2020)	Human-centered Explainable AI: Towards a Reflective Sociotechnical Approach	2020	E-147
Silva et al. (2023)	Explainable Artificial Intelligence: Evaluating the Objective and Subjective Impacts of xAI on Human-Agent Interaction	2023	E-148																																										x
Guizzardi and Guardino (2023)	Semantics, Ontology and Explanation	2023	E-151
Mucha et al. (2021)	Interfaces for Explanations in Human-AI Interaction: Proposing a Design Evaluation Approach	2021	E-152
Hamon (2021)	Impossible Explanations? Beyond explainable AI in the GDPR from a COVID-19 use case scenario	2021	E-154
Brunotte et al. (2023)	Privacy explanations – A means to end-user trust	2023	E-155
Wang et al. (2018)	TEM: Tree-enhanced Embedding Model for Explainable Recommendation	2018	E-159
Gregor and Bensabat (1999)	Explanations from Intelligent Systems: Theoretical Foundations and Implications for Practice	1999	E-160
Schwammberger (2021)	A Quest of Self-Explainability: When Causal Diagrams meet Autonomous Urban Traffic Manoeuvres	2021	E-165	E-188
Ziesche et al. (2021)	Anomaly Detection and Classification to enable Self-Explainability of Autonomous Systems	2021	E-166
Capuano et al. (2022)	Explainable Artificial Intelligence in CyberSecurity: A Survey	2022	E-167																																											x
Bhatt et al. (2020)	Explainable Machine Learning in Deployment	2020	E-169
Zhang and Chen (2020)	Explainable Recommendation: A Survey and New Perspectives	2020	E-170
Glanois et al. (2022)	A Survey on Interpretable Reinforcement Learning	2022	E-171																												x
Shorabi et al. (2011)	Preferred Explanations: Theory and Generation via Planning	2011	E-174
Seegebarth et al. (2012)	Making Hybrid Plans More Clear to Human Users — A Formal Approach for Generating Sound Explanations	2012	E-176
Langley et al. (2017)	Explainable Agency for Intelligent Autonomous Systems	2017	E-178
Angelov et al. (2021)	Explainable artificial intelligence: an analytical review	2021	E-180
Belle and Papantonis (2021)	Principles and Practice of Explainable Machine Learning	2021	E-181
McDermid et al. (2021)	Artificial intelligence explainability: the technical and ethical dimensions	2021	E-182
Hase and Bansal (2020)	Evaluating Explainable AI: Which Algorithmic Explanations Help Users Predict Model Behavior?	2020	E-185
Tomsett et al. (2018)	Interpretable to Whom? A Role-based Model for Analyzing Interpretable Machine Learning Systems	2018	E-186
Ras et al. (2018)	Explanation Methods in Deep Learning: Users, Values, Concerns and Challenges	2018	E-194
Pedreschi et al. (2019)	Meaningful Explanations of Black Box AI Decision Systems	2019	E-200
Xie & Yu (2018)	Next Generation Trustworthy Fraud Detection	2018	E-201
Chiyah Garcia et al. (2018)	Explainable Autonomy: A Study of Explanation Styles for Building Clear Mental Models	2018	E-207																																													x
Jaakkola et al. (2022)	Explainability via Short Formulas: the Case of Propositional Logic with Implementation	2022	E-222
Jaakkola et al. (2022)	Explainability via Short Formulas: the Case of Propositional Logic with Implementation	2022	E-222.2
Lenhof et al. (2024)	Trust me if you can: a survey on reliability and interpretability of machine learning approaches for drug sensitivity prediction in cancer	2024	E-227
Holzinger et al. (2017)	What do we need to build explainable AI systems for the medical domain?	2017	E-228																																x											x
Doshi Velez et al. (2017)	Accountability of AI Under the Law:The Role of Explanation	2017	E-231
Johnson et al. (2022)	Integrating human knowledge into artificial intelligence for complex and ill-structured problems: Informed artificial intelligence	2022	E-233
Leslie (2019)	Understanding artificial intelligence ethics and safety: A guide for the responsible design and implementation of AI systems in the public sector. The Alan Turing Institute	2019	E-234
Association for Computing Machinery (ACM) (2017)	ACM US Public Policy Council’s ‘Statement onAlgorithmic Transparency and Accountability’	2017	E-235
European Law Institute (2022)	Model Rules on ImpactAssessment of Algorithmic Decision-MakingSystems Used by Public Administration	2022	E-236
IBM (n.a.)	Explainable AI	n.a.	E-237
Microsoft (2018)	The Future Computed: ArtificialIntelligence and its Role in Society	2018	E-238
ISO/IEC FDIS 22989 (JTC 1/SC 42)	Information technology – Artificial intelligence – Artificial intelligence concepts and terminology	n.a.	E-239
European Union (2018)	Regulation (EU) 2016/679(General Data Protection Regulation)	2018	E-240
European Union (2019)	European Commission,Directorate-General for Communications Networks,Content and Technology, Ethics guidelines fortrustworthy AI, Publications Office	2019	E-241
European Union. European Commission, JointResearch Centre, Sanchez, I., Junklewitz, H.,Hamon, R. (2020)	Robustness and explainability ofArtificial Intelligence : from technical to policysolutions. Publications Office	2020	E-242
UNESCO. Ad Hoc Expert Group (AHEG)	FirstDraft of the Recommendation on the Ethics ofArtificial Intelligence	2020	E-243
OECD. (2019)	The OECD Artificial Intelligence (AI)Principles, OECD.AI	2019	E-244
United Arab Emirates (2019)	Smart Dubai, Dubai’s AI Principles	2019	E-245
Monetary Authority of Singapore (2018)	Principles toPromote Fairness, Ethics, Accountability and Transparency (FEAT) in the Use of AI and Data Analytics in Singapore’s Financial Sector	2018	E-246
Singapore Personal Data Protection Commission (PDPC) (2020) -	A compilation of existing AI ethical principles (Annex A)	2020	E-247
Popular Republic of China (effective in 2022)	Internet Information Service Algorithmic Recommendation Management Provisions	2022	E-248
Council for Social Principles of Human-centric AI by Cabinet Office, Government of Japan (2019)	Social Principles of Human-Centric AI	2019	E-249
Ministry of Internal Affairs and Communications (MIC), the Government of Japan (2017)	AI R&D Principles	2017	E-250			x
Turek, M. (2018)	Explainable artificial intelligence (XAI).’’ Defense Advanced Research Projects Agency. Department of Defense of the United States.	2018	E-251
Government of Canada (2019)	Responsible use of AI	2019	E-252
Lewis (1986)	Causal explanation	1986	E-253
Josephson & Josephson (1996)	Abductive inference:Computation, philosophy, technology	1996	E-254
Lombrozo (2006)	The structure and function of explanations	2006	E-255
Lundberg & Lee (2017)	A unified approach to interpreting model predictions	2017	I-256
Dam et al. (2018)	Explainable software analytics	2018	E-257
Lakkaraju et al. (2019)	Faithful and customizable explanations of black box models	2019	E-258
Vilone & Longo (2020)	Explainable artificial intelligence:a systematic review	2020	E-259
Vilone & Longo (2020)	Explainable artificial intelligence:a systematic review	2020	I-259
Schmid & Finzel (2020)	Mutual explanations for cooperative decision making in medicine	2020	E-260
Al-Shedivat et al. (2020)	Contextual explanation networks	2020	E-261
Arya et al. (2019)	One explanation does not fit all: A toolkit and taxonomy of ai explainability techniques	2019	E-262
Arya et al. (2019)	One explanation does not fit all: A toolkit and taxonomy of ai explainability techniques	2019	I-262
Mitelstadt et al. (2019)	Explaining explanations in AI	2019	E-263
Mitelstadt et al. (2019)	Explaining explanations in AI	2019	I-263
Chromik & Schuessler (2020)	A taxonomy for human subject evaluation of black-box explanations in xai	2020	E-264
Chromik & Schuessler (2020)	A taxonomy for human subject evaluation of black-box explanations in xai	2020	I-264
Ciatto et al. (2020)	Towards XMAS: explainability through multi-agent systems	2020	E-265
Wang et al. (2018)	A Reinforcement Learning Framework for Explainable Recommendation	2018	E-266
Tintarev (2007)	Effective Explanations of Recommendations: User-Centered Design	2007	E-267
Holzinger et al. (2017)	What do we need to build explainable AI systems for the medical domain?	2017	E-268
The Royal Society (2019)	Explainable AI: the basics – POLICY BRIEFING	2019	E-269
The Royal Society (2019)	Explainable AI: the basics – POLICY BRIEFING	2019	I-269
Rai (2020)	Explainable AI: from black box to glass box	2020	E-270
Islam et al. (2022)	A Systematic Review of Explainable Artificial Intelligence in Terms of Different Application Domains and Tasks	2022	E-271
Danilevsky et al. (2021)	A Survey of the State of Explainable AI for Natural Language Processing	2021	E-272
Zhang & Chen (2020)	Explainable Recommendation: A Surveyand New Perspectives	2020	E-273
Haque et al. (2023)	Explainable Artificial Intelligence (XAI) from a user perspective: A synthesis of prior literature and problematizing avenues for future research	2023	E-274
Retzlaff et al. (2024)	Post-hoc vs ante-hoc explanations: xAI design guidelines for data scientists	2024	E-277
Kraišniković et al. (2025)	Fine-tuning language model embeddings to reveal domain knowledge: An explainable artificial intelligence perspective on medical decision making	2025	E-278
Hanif et al. (2021)	A Survey on Explainable Artificial Intelligence Techniques and Challenges	2021	E-279
Mohseni et al. (2021)	A Multidisciplinary Survey and Framework for Design and Evaluation of Explainable AI Systems	2021	E-281																																	x
Sheh (2017)	“Why Did You Do That?” Explainable Intelligent Robots	2017	E-285
Van Lent (2004)	An Explainable Artificial Intelligence System for Small-unit Tactical Behavior	2004	E-291
Barredo Arrieta et al. (2020)	Explainable Artificial Intelligence (XAI): Concepts, taxonomies, opportunities and challenges toward responsible AI	2020	I-1
Montavon et al. (2018)	Methods for Interpreting and Understanding Deep Neural Networks	2018	I-2
Lipton (2016)	The Mythos of Model Interpretability	2016	I-3	E-56																																												x
Lou et al. (2012)	Intelligible models for classification and regression	2012	I-4
Gall (2018)	Machine Learning Explainability vs Interpretability: Two concepts that could help restore trust in AI	2018	I-5																				x	x
Ribeiro et al. (2016)	“Why Should I Trust You?” Explaining the Predictions of Any Classifier	2016	I-7
Ribeiro et al. (2016)	“Why Should I Trust You?” Explaining the Predictions of Any Classifier	2016	I-7.2
Kim et al. (2016)	Examples are not Enough, Learn to Criticize! Criticism for Interpretability	2016	I-8
Dib (2024)	Formal definition of Interpretability and Explainability in XAI	2024	I-9																											x
Marconato et al. (2022)	GlanceNets: Interpretable, Leak-proof Concept-based Models	2022	I-13
Doshi-Velez et al. (2017)	Towards A Rigorous Science of Interpretable Machine Learning	2017	I-17	I-43; I-77; I-89; I-143
Gilpin (2021)	Explaining Explanations: An Overview of Interpretability of Machine Learning	2021	I-21																																							x
Gacto (2010)	Integration of an Index to Preserve the Semantic Interpretability in the Multiobjective Evolutionary Rule Selection and Tuning of Linguistic Fuzzy Systems	2020	I-27									x										x									x
Gacto (2010)	Integration of an Index to Preserve the Semantic Interpretability in the Multiobjective Evolutionary Rule Selection and Tuning of Linguistic Fuzzy Systems	2020	I-27.2																												x
Rudin (2018)	Stop Explaining Black Box Machine Learning Models for High Stakes Decisions and Use Interpretable Models Instead	2018	I-28
Liu et al. (2021)	Trustworthy AI: A Computational Perspective	2021	I-33																				x	x
Chakraborty et al. (2017)	Interpretability of Deep Learning Models: A Survey of Results	2017	I-38
Radiuk et al. (2024)	Explainable Artificial Intelligence: Transitioning DL Model Decisions to User-Understandable Features in Healthcare	2024	I-39																																									x
Antoniou and Bargiannis (2022)	Mental Health Diagnosis: A Case for Explainable Artificial Intelligence	2022	I-40
Ali et al. (2023)	Explainable Artificial Intelligence (XAI): What we know and what is left to attain Trustworthy Artificial Intelligence	2023	I-41																																							x			x
Zhang (2021)	A Survey on Neural Network Interpretability	2021	I-44																												x
Gacto et al. (2011)	Interpretability of linguistic fuzzy rule-based systems: An overview of interpretability measures	2011	I-45																																														x
Rosenfeld and Richardson (2019)	Explainability in human-agents systems	2019	I-46	i-102
Alonso et al. (2009)	Looking for a good fuzzy system interpretability index: An experimental approach	2009	I-48									x
Mikut (2003)	Interpretability issues in data-based learning of fuzzy systems	2003	I-49	I-67									x
Zablocki et al. (2022)	Explainability of Deep Vision-Based Autonomous Driving Systems: Review and Challenges	2022	I-51
Alonso et al. (2015)	Interpretability of Fuzzy Systems: Current Research Trends and Prospects	2015	I-52
Ding et al. (2022)	Explainability of artificial intelligence methods, applications and challenges: A comprehensive survey	2022	I-53
Mencar (2011)	Interpretability assessment of fuzzy knowledge bases: A cointension based approach	2011	I-54
Sakai and Nagai (2022)	Explainable autonomous robots: a survey and Perspective	2022	I-60
Verhagen et al. (2021)	A two-dimensional Explanation Framework to Classify AI as Incomprehensible, Interpretable, or Understandable	2021	I-66
Mariotti (2023)	Exploring the balance between interpretability and performance with carefully designed constrainable Neural Additive Models	2023	I-69
Retzlaff (2024)	Human-in-the-Loop Reinforcement Learning: A Survey and Position on Requirements, Challenges, and Opportunities	2024	I-70
Bellucci et al. (2021)	Towards a terminology for a fully contextualized XAI	2021	I-71		x
Nizam and Zafar (2023)	Explainable Artificial Intelligence (XAI): Conception, Visualization and Assessment Approaches Towards Amenable XAI	2023	I-72
Kim et al. (2019)	The Structure of Deep Neural Network for Interpretable Transfer Learning	2019	I-73
Cortiñas-Lorenzo and Lacey (2024)	Toward Explainable Affective Computing: A Review	2024	I-74					x
Palacio et al. (2021)	XAI Handbook: Towards a Unified Framework for Explainable AI	2021	I-76
Hall (2021)	A United States Fair Lending Perspective on Machine Learning	2021	I-77
Graziani et al. (2023)	A global taxonomy of interpretable AI: unifying the terminology for the technical and social sciences	2023	I-79												x
Frasca et al. (2024)	Explainable and interpretable artificial intelligence in medicine: a systematic bibliometric review	2024	I-81																				x	x
Xu Kang et al. (2023)	Interpretability for reliable, efficient, and self-cognitive DNNs: From theories to applications	2023	I-82
Gaudio et al. (2022)	DeepFixCX: Explainable privacy-preserving image compression for medical image analysis	2022	I-83
Zhiwen Chen et al. (2021)	GCN-CAM: A new graph convolutional network-based fault diagnosis method with its interpretability analysis	2021	I-84
Xu and Yang (2025)	Interpretability research of deep learning: A literature survey	2025	I-85
Namatevs et al. (2022)	Interpretability versus Explainability: Classification for Understanding Deep Learning Systems and Models	2022	I-86
Sipple & Youssef (2022)	A general-purpose method for applying Explainable AI for Anomaly Detection	2022	I-87
Hepworth et al. (2021)	Human-Swarm-Teaming Transparency and Trust Architecture	2021	I-88
Roque & Damorodan (2022)	Explainable AI for Security of Human-Interactive Robots	2022	I-91																									x
Nicodeme and Denis (2020)	Build confidence and acceptance of AI-based decision support systems - Explainable and liable AI	2020	I-93																																												x
Batra and Mahajan (2021)	Deep Learning Models: An Understandable Interpretable Approach	2021	I-98
Roundtree (2023)	AI Explainability, Interpretability, Fairness, and Privacy: An Integrative Review of Reviews	2023	I-100
Aguirre-Zapata et al. (2023)	Understanding Interpretability in Modeling Biotechnological Processes: A Critical Review	2023	I-103
Gupta (2023)	Explainable Artificial Intelligence with Conceptual Model Guiding in the Perspective of Stakeholders in Interdisciplinary Research	2023	i-104
Layfield and Neri (2023)	Explainability and interpretability in decision trees and agend based modelling When approximating financial time series. A matter of balance with performance	2023	i-107
Quinn et al. (2020)	DeepCoDA: personalized interpretability for compositional health	2020	I-108
Ortigossa et al. (2024)	EXplainable Artificial Intelligence (XAI)—From Theory to Methods and Applications	2024	I-110
Gou et al (2023)	A Fundamental Model with Stable Interpretability for Traffic Forecasting	2023	I-111
Holmberg et al. (2020)	Evaluating Interpretability in Machine Teaching	2020	I-113
Picard et al. (2023)	Human-Computer Interaction and Explainability: Intersection and Terminology	2023	I-115																												x
Neri (2023)	Explainability and Interpretability in Agent based Modelling to Approximate Market Indexes	2023	I-116	I-107
Xu (2024)	Toward Building Computational Well-Being Ecosystems	2024	I-118
Dong et al. (2024)	Interpretability as Approximation: Understanding Black-Box Models by Decision Boundary	2024	I-119
Khan et al. (2024)	Heterogeneous transfer learning: recent developments, applications, and challenges	2024	I-121																																x
Černevičienė & Kabašinskas (2024)	Explainable artifcial intelligence (XAI) in fnance: a systematic literature review	2024	I-122
Gauriat et al. (2023)	Multi-class Neural Additive Models : An Interpretable Supervised Learning Method for Gearbox Degradation Detection	2023	I-124
Carvalho et al. (2019)	Machine Learning Interpretability: A Survey on Methods and Metrics	2019	i-127
Murdoch et al. (2019)	Interpretable machine learning: definitions, methods, and applications	2019	I-128
INDEPENDENT HIGH-LEVEL EXPERT GROUP ON ARTIFICIAL INTELLIGENCE SET UP BY THE EUROPEAN COMMISSION (2020)	THE ASSESSMENT LIST FOR TRUSTWORTHY ARTIFICIAL INTELLIGENCE (ALTAI) for self assessment	2020	E-130
Doran et al. (2018)	What Does Explainable AI Really Mean? A New Conceptualization of Perspectives	2018	I-131	I-16; I-70
Ciatto et al. (2020)	Agent-Based Explanations in AI: Towards an Abstract Framework	2020	I-132	I-168
Calegari et al. (2020)	On the integration of symbolic and sub-symbolic techniques for XAI: A survey	2020	I-133																																												x
Broniatowski (2021)	Psychological Foundations of Explainability and Interpretability in Artificial Intelligence	2021	I-135
Li et al. (2022)	Interpretable Deep Learning: Interpretation, Interpretability, Trustworthiness, and Beyond	2022	I-137
Gleaves et al. (2020)	THE ROLE OF INDIVIDUAL USER DIFFERENCES IN INTERPRETABLE AND EXPLAINABLE MACHINE LEARNING SYSTEMS	2020	I-139
Das and Rad (2020)	Opportunities and challenges in explainable artificial intelligence (XAI): a survey	2020	I-140																																												x
Burkart and Huber (2021)	A survey on the explainability of supervised machine learning	2021	I-141																																													x
Murdoch et al. (2022)	Definitions, methods, and applications in interpretable machine learning	2022	I-144
Amann et al. (2022)	To explain or not to explain?—Artificial intelligence explainability in clinical decision support systems	2022	I-145
Tjoa & Guan (2020)	A Survey on Explainable Artificial Intelligence (XAI): Toward Medical XAI	2020	I-146																														x
Ehsan and Riedl (2020)	Human-centered Explainable AI: Towards a Reflective Sociotechnical Approach	2020	I-147
Silva et al. (2023)	Explainable Artificial Intelligence: Evaluating the Objective and Subjective Impacts of xAI on Human-Agent Interaction	2023	I-148
Biran and Cotton (2017)	Explanation and Justification in Machine Learning: A Survey	2017	I-149	I-19
Fan et al. (2021)	On Interpretability of Artificial Neural Networks: A Survey	2021	I-150
Guizzardi and Guardino (2023)	Semantics, Ontology and Explanation	2023	I-151
Lakkaraju et al. (2016)	Interpretable Decision Sets: A Joint Framework for Description and Prediction	2016	I-157																													x
Peake and Wang (2016)	Explanation Mining: Post Hoc Interpretability of Latent Factor Models for Recommendation Systems	2018	I-158
Chazette and Schneider (2020)	Explainability as a non‑functional requirement: challenges and recommendations	2020	i-164
Capuano et al. (2022)	Explainable Artificial Intelligence in CyberSecurity: A Survey	2022	I-167
Glanois et al. (2022)	A Survey on Interpretable Reinforcement Learning	2022	I-171														x												x
Trivedi et al. (2024)	Explainable AI for Industry 5.0: Vision, Architecture, and Potential Directions	2024	I-173																															x
Angelov et al. (2021)	Explainable artificial intelligence: an analytical review	2021	I-180
Tomsett et al. (2018)	Interpretable to Whom? A Role-based Model for Analyzing Interpretable Machine Learning Systems	2018	I-186								x																								x
Dhurandar et al. (2017)	A Formal Framework to Characterize Interpretability of Procedures	2017	I-189	I-204
Ibrahim et al. (2019)	Global Explanations of Neural Network	2019	I-196
Rudin et al. (2021)	Interpretable Machine Learning: Fundamental Principles and 10 Grand Challenges	2021	I-198
Poursabzi-Sangdeh (2021)	Manipulating and Measuring Model Interpretability	2021	I-199																x
Chakraborti et al. (2019)	Explicability? Legibility? Predictability? Transparency? Privacy? Security? The Emerging Landscape of Interpretable Agent Behavior	2019	I-219
Coteaux et al. (2019)	Towards Interpretability of Segmentation Networks by Analyzing DeepDreams	2019	I-220
Lenhof et al. (2024)	Trust me if you can: a survey on reliability and interpretability of machine learning approaches for drug sensitivity prediction in cancer	2024	I-227																																	x
Margot & Luta (2021)	A New Method to Compare the Interpretability of Rule-Based Algorithms	2021	I-229
Weller (2017)	Challenges for Transparency	2017	E-230
Ciatto et al. (2020)	Towards XMAS: explainability through multi-agent systems	2020	I-265
Rai (2020)	Explainable AI: from black box to glass box	2020	I-270						x
Haque et al. (2023)	Explainable Artificial Intelligence (XAI) from a user perspective: A synthesis of prior literature and problematizing avenues for future research	2023	I-274
Khosravi et al. (2022)	Explainable Artificial Intelligence in education	2022	I-275
Weber et al. (2024)	Applications of Explainable Artifcial Intelligence in Finance—a systematic review of Finance, Information Systems, and Computer Science literature	2024	I-276
Retzlaff et al. (2024)	Post-hoc vs ante-hoc explanations: xAI design guidelines for data scientists	2024	I-277																												x								x									x
Kraišniković et al. (2025)	Fine-tuning language model embeddings to reveal domain knowledge: An explainable artificial intelligence perspective on medical decision making	2025	I-278
Hanif et al. (2021)	A Survey on Explainable Artificial Intelligence Techniques and Challenges	2021	I-279
Choo & Liu (2018)	Visual Analytics for Explainable Deep Learning	2018	I-280
Mohseni et al. (2021)	A Multidisciplinary Survey and Framework for Design and Evaluation of Explainable AI Systems	2021	I-281
Wang & Lin (2021)	Hybrid Predictive Models: When an Interpretable Model Collaborates with a Black-box Model	2021	I-282																	x	x
Sahakyan et al. (2022)	Explainable Artificial Intelligence for Tabular Data: A Survey	2022	I-284
Beaudouin et al. (2020)	Flexible and Context-Specific AI explainability: A Multidisciplinary Approach	2020	I-287
Mencar & Fanelli (2008)	Interpretability constraints for fuzzy information granulation	2008	I-289
Hamon et al. (2020)	Robustness and Explainability of Artificial Intelligence	2020	I-293																																		x
Lei, Barzilay and Jaakkola (2016 )	Rationalizing Neural Predictions	2016	I-294																												x
[truncated: 461 more columns]
